# Supplementary material
Source: MDPI journal article supplement (https://www.mdpi.com/2075-163X/13/10/1256)
Supplement: s1 [file s1]

# The REE-Zr-U-Th minerals of the Maronia monzodiorites, N. Greece: Implications on the saturation and segregation mechanisms of critical metals in intermediate-mafic compositions

Charalampos Vasilatos and Angeliki Papoutsas

Table S1. EDS analyses and stoichiometric formula of the Maronia zirconolites.

| Sample                                                  | MAR-1         |               |               |               |               |               |              |
|---------------------------------------------------------|---------------|---------------|---------------|---------------|---------------|---------------|--------------|
| SiO <sub>2</sub>                                        | 0.69          | n.d.          | n.d.          | n.d.          | n.d.          | n.d.          | 2.07         |
| TiO <sub>2</sub>                                        | 37.96         | 37.14         | 34.87         | 34.35         | 31.61         | 31.52         | 28.50        |
| Al <sub>2</sub> O <sub>3</sub>                          | 0.65          | n.d.          | n.d.          | n.d.          | n.d.          | n.d.          | n.d.         |
| FeO                                                     | 10.16         | 14.56         | 14.35         | 11.06         | 12.49         | 12.08         | 10.71        |
| CaO                                                     | 11.09         | 8.56          | 5.99          | 7.41          | 4.83          | 4.18          | 4.99         |
| Ce <sub>2</sub> O <sub>3</sub>                          | n.d.          | n.d.          | n.d.          | 4.70          | n.d.          | n.d.          | n.d.         |
| Nd <sub>2</sub> O <sub>3</sub>                          | n.d.          | n.d.          | n.d.          | 2.90          | 4.45          | 3.28          | 3.05         |
| Y <sub>2</sub> O <sub>3</sub>                           | n.d.          | n.d.          | 12.34         | n.d.          | n.d.          | 11.31         | n.d.         |
| Nb <sub>2</sub> O <sub>5</sub>                          | n.d.          | n.d.          | n.d.          | n.d.          | n.d.          | n.d.          | n.d.         |
| ZrO <sub>2</sub>                                        | 32.23         | 31.52         | 32.45         | 23.43         | 23.44         | 29.29         | 21.10        |
| ThO <sub>2</sub>                                        | 5.32          | 8.22          | n.d.          | 2.38          | 6.26          | n.d.          | 12.33        |
| UO <sub>2</sub>                                         | n.d.          | n.d.          | n.d.          | 13.77         | 14.28         | 8.35          | 17.16        |
| <b>Total</b>                                            | <b>100.00</b> | <b>100.00</b> | <b>100.00</b> | <b>100.00</b> | <b>100.00</b> | <b>100.01</b> | <b>99.91</b> |
| <b>Structural formula based on 7 oxygens (a.p.f.u.)</b> |               |               |               |               |               |               |              |
| <b><u>M1-site</u></b>                                   |               |               |               |               |               |               |              |
| Ca                                                      | 0.725         | 0.575         | 0.400         | 0.539         | 0.366         | 0.298         | 0.387        |
| Na                                                      | 0.000         | 0.000         | 0.000         | 0.000         | 0.000         | 0.000         | 0.000        |
| Zr                                                      | 0.200         | 0.310         | 0.190         | 0.030         | 0.200         | 0.100         | 0.060        |
| Ti                                                      | 0.000         | 0.000         | 0.000         | 0.000         | 0.000         | 0.000         | 0.000        |
| REE                                                     | 0.000         | 0.000         | 0.409         | 0.187         | 0.113         | 0.479         | 0.079        |
| Th                                                      | 0.074         | 0.117         | 0.000         | 0.037         | 0.101         | 0.000         | 0.203        |
| U                                                       | 0.000         | 0.000         | 0.000         | 0.208         | 0.225         | 0.124         | 0.276        |
| <b>Total</b>                                            | <b>0.999</b>  | <b>1.002</b>  | <b>0.999</b>  | <b>1.001</b>  | <b>1.005</b>  | <b>1.001</b>  | <b>1.005</b> |
| <b><u>M2-site</u></b>                                   |               |               |               |               |               |               |              |
| Zr                                                      | 0.759         | 0.653         | 0.796         | 0.746         | 0.609         | 0.852         | 0.684        |
| Ti                                                      | 0.241         | 0.347         | 0.204         | 0.254         | 0.391         | 0.148         | 0.316        |
| Ca                                                      |               |               |               |               |               |               |              |
| <b>Total</b>                                            | <b>1.000</b>  | <b>1.000</b>  | <b>1.000</b>  | <b>1.000</b>  | <b>1.000</b>  | <b>1.000</b>  | <b>1.000</b> |
| <b><u>M3-site</u></b>                                   |               |               |               |               |               |               |              |
| Ti                                                      | 1.500         | 1.404         | 1.430         | 1.501         | 1.293         | 1.431         | 1.235        |
| Zr                                                      |               |               |               |               |               |               |              |
| Fe                                                      | 0.500         | 0.596         | 0.570         | 0.499         | 0.707         | 0.569         | 0.765        |
| <b>Total</b>                                            | <b>2.000</b>  | <b>2.000</b>  | <b>2.000</b>  | <b>2.000</b>  | <b>2.000</b>  | <b>2.000</b>  | <b>2.000</b> |
| <b><u>M4-site</u></b>                                   |               |               |               |               |               |               |              |
| Fe                                                      | 0.018         | 0.167         | 0.177         | 0.129         | 0.033         | 0.104         | 0.000        |
| Ti                                                      | 0.000         | 0.000         | 0.000         | 0.000         | 0.000         | 0.000         | 0.000        |
| <b>Total</b>                                            | <b>0.018</b>  | <b>0.167</b>  | <b>0.177</b>  | <b>0.129</b>  | <b>0.033</b>  | <b>0.104</b>  | <b>0.000</b> |
| <b>Total cations</b>                                    | <b>4.017</b>  | <b>4.169</b>  | <b>4.176</b>  | <b>4.131</b>  | <b>4.037</b>  | <b>4.106</b>  | <b>4.005</b> |

(a)

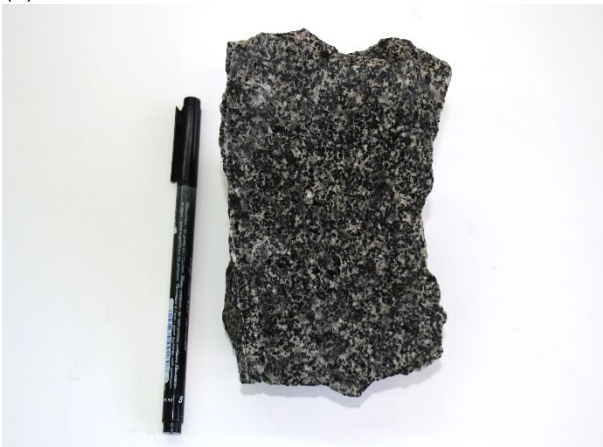

(b)

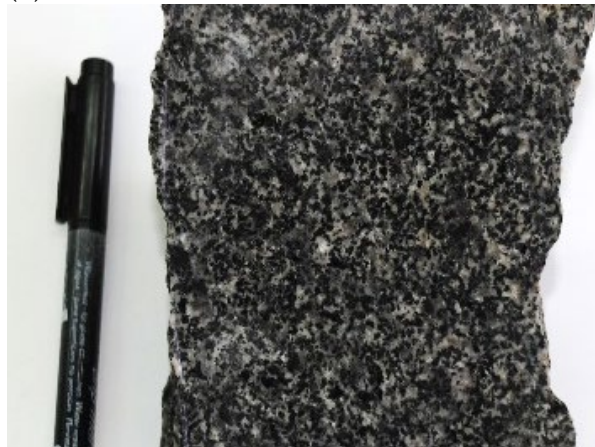

**Figure S1.** Hand specimens' photographs of Maronia monzodiorite samples (a,b).

(a)

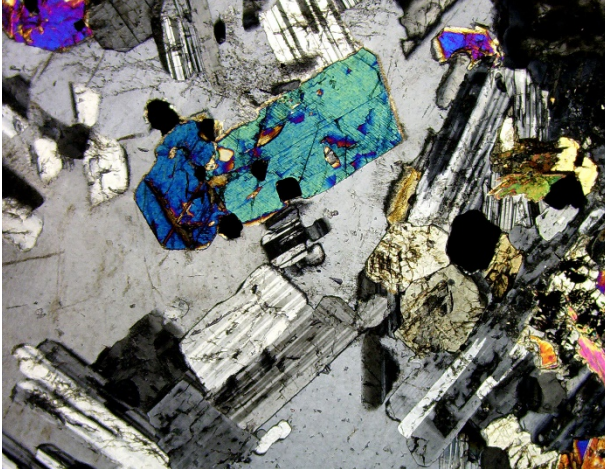

(b)

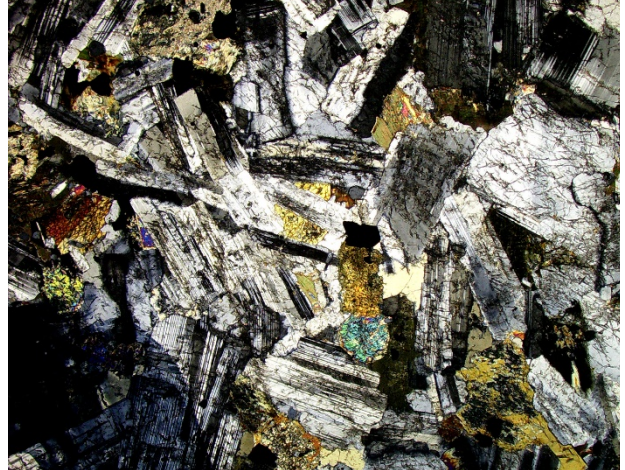

(c)

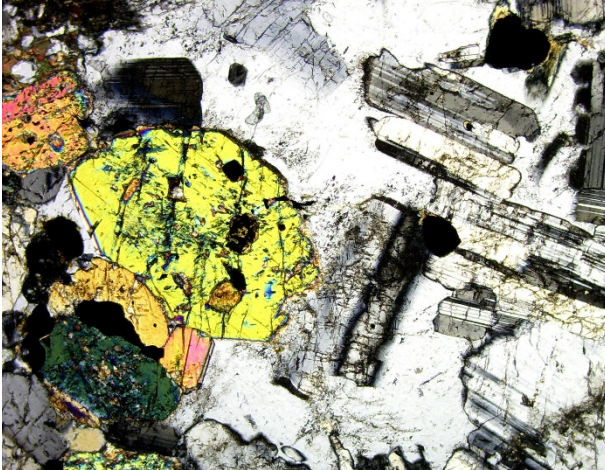

(d)

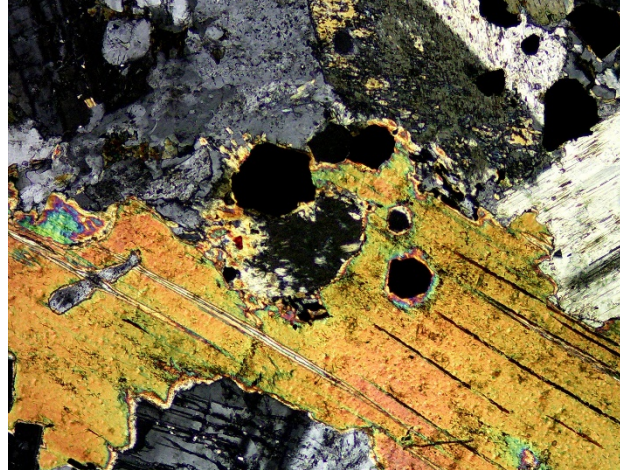

**Figure S2.** Representative microphotographs of the studied Maronia samples from petrographic microscope under crossed polarizers.
